# Supplementary material
Source: MDPI journal article supplement (https://www.mdpi.com/2071-1050/13/10/5654)
Supplement: s1 [file s1]

**Table S1.** The calculation formulas and methods of ecosystem services

| Formulas                                                                 | The meaning of each alphabets                                                                                                                                                                                                                                                                                                                                                                                                                                                                                                                                                                                                                                                                                                                                                                                                                                                                      |
|--------------------------------------------------------------------------|----------------------------------------------------------------------------------------------------------------------------------------------------------------------------------------------------------------------------------------------------------------------------------------------------------------------------------------------------------------------------------------------------------------------------------------------------------------------------------------------------------------------------------------------------------------------------------------------------------------------------------------------------------------------------------------------------------------------------------------------------------------------------------------------------------------------------------------------------------------------------------------------------|
| $W_i = P \cdot A$                                                        | W is the food production value of the wine industry (RMB·year <sup>-1</sup> ). A is the winegrapes area (3.8×10 <sup>8</sup> m <sup>2</sup> of winegrapes area in the Eastern Foot of Helan Mountain, Ningxia; 7.067×10 <sup>7</sup> m <sup>2</sup> of winegrapes area in Hongsibu). P is the winegrapes profits (RMB·m <sup>-2</sup> ·year <sup>-1</sup> ), the winegrapes profits equal to 4.9 RMB·m <sup>-2</sup> ·year <sup>-1</sup> .                                                                                                                                                                                                                                                                                                                                                                                                                                                         |
| $CV = P_c \cdot N \cdot A \cdot a$<br>$OV = P_o \cdot N \cdot A \cdot b$ | CV is the value of carbon sequestration (RMB·year <sup>-1</sup> ). P <sub>c</sub> is the carbon price (RMB/t). According to the Chinese afforestation cost method, the carbon price was equal to 273.3 RMB/t. N is the net exchange of CO <sub>2</sub> in the vineyard ecosystem. According to the research results [28], the net CO <sub>2</sub> exchange rate (NEE) of the vineyard ecosystem was equal to 887.59 g·m <sup>-2</sup> ·year <sup>-1</sup> in the arid region of northwestern China. A is the vineyard area (m <sup>2</sup> ). <i>a</i> represents the proportional coefficient of 0.2727.<br>OV is the value of oxygen release (RMB·year <sup>-1</sup> ). P <sub>o</sub> is the oxygen release price. According to the Chinese afforestation cost method, the price of oxygen was equal to 369.7 (RMB·t <sup>-1</sup> ). <i>b</i> represents the proportional coefficient of 0.73. |
| $U = K \cdot Q \cdot A$                                                  | U is the total value of absorbed gas and dust (RMB·year <sup>-1</sup> ). K is the unit price of absorbed gas or dust (RMB·kg <sup>-1</sup> ). Q is the amount of gas and dust absorbed by the vineyard per unit area (kg·m <sup>-2</sup> ·year <sup>-1</sup> ). A is the vineyard area (m <sup>2</sup> ). According to this research [30], the unit price of SO <sub>2</sub> , NO <sub>x</sub> , HF, and dust control was equal to 0.6, 0.9, 0.6, and 170 (RMB·kg <sup>-1</sup> ), respectively. The amount of gas and dust absorbed by the vineyard per unit area was equal to 90.0, 8.0, 0.8 and 9.0 (kg·ha <sup>-1</sup> ·year <sup>-1</sup> ).                                                                                                                                                                                                                                                 |
| $W_s = (A - L) \cdot C \cdot P$                                          | W is the value of soil conservation (RMB·year <sup>-1</sup> ). A is the soil erosion modulus (t·m <sup>-2</sup> ·year <sup>-1</sup> ). L is the amount of soil loss (t·m <sup>-2</sup> ·year <sup>-1</sup> ). C is the vineyard area (m <sup>2</sup> ). P is the price of soil conservation (RMB·t <sup>-1</sup> ). According to the statistics of the Ningxia Water Conservancy, the original landform soil erosion modulus of the winegrapes region was equal to 0.003 t·m <sup>-2</sup> ·year <sup>-1</sup> , and the soil loss was equal to 0.001 t·m <sup>-2</sup> ·year <sup>-1</sup> . The price of soil conservation was equal to 6.52 RMB·t <sup>-1</sup> [30].                                                                                                                                                                                                                           |
| $W_w = (R - E) \cdot A \cdot P$                                          | W is the value of water conservation (RMB·year <sup>-1</sup> ). R is the annual average rainfall (mm·year <sup>-1</sup> ). E is the annual average evapotranspiration (mm·year <sup>-1</sup> ). A is the vineyard area (m <sup>2</sup> ). P is the unit water storage fee (RMB·m <sup>-3</sup> ). Statistics from the Ningxia Water Conservancy show that the average annual rainfall of the winegrapes region was equal to 200 mm·year <sup>-1</sup> , the average evapotranspiration was equal to 184 mm·year <sup>-1</sup> . The unit water storage cost was equal to 0.67 RMB·m <sup>-3</sup> .                                                                                                                                                                                                                                                                                                |
| $Q = (X - x) \cdot A \cdot P$                                            | Q is the value of water-saving and efficiency-enhancing (RMB·year <sup>-1</sup> ). X is the average water consumption of agricultural irrigation in Ningxia (m <sup>3</sup> ·m <sup>-2</sup> ). <i>x</i> is the average water consumption of the winegrapes industry (m <sup>3</sup> ·m <sup>-2</sup> ). A is the vineyard area (m <sup>2</sup> ). P is the price of water (RMB·m <sup>-3</sup> ·year <sup>-1</sup> ). According to the statistics of Ningxia Water Conservancy, the agricultural irrigation water in Ningxia was equal to 0.954 m <sup>3</sup> ·m <sup>-2</sup> , the irrigation water for winegrapes was equal to 0.8535 m <sup>3</sup> ·m <sup>-2</sup> , the water price was equal to 0.22 RMB·m <sup>-3</sup> ·year <sup>-1</sup> .                                                                                                                                           |

|                         |                                                                                                                                                                                                                                                                                                                                                                                                                                                                                                                                 |
|-------------------------|---------------------------------------------------------------------------------------------------------------------------------------------------------------------------------------------------------------------------------------------------------------------------------------------------------------------------------------------------------------------------------------------------------------------------------------------------------------------------------------------------------------------------------|
| $V = P \cdot N \cdot Y$ | <hr/> <p>V is the total ecotourism income (RMB·year<sup>-1</sup>). P is per capita tourism consumption (RMB·year<sup>-1</sup>). N is the total number of tourists (person). Y is time (year). The ecological tourism value of the wine industry was equal to 3.42×10<sup>8</sup> RMB·year<sup>-1</sup> in the Eastern Foot of Helan Mountain [30], and the ecotourism value is estimated to 6.36×10<sup>7</sup> RMB·year<sup>-1</sup> in Hongsibu.</p> <hr/>                                                                    |
| $PA = P \cdot N$        | <p>PA is the total annual income of ecological poverty alleviation (RMB·year<sup>-1</sup>). P is the per capita wage income (RMB·year<sup>-1</sup>). N is the total number of eco-poverty alleviation (person). The total annual income of eco-poverty alleviation of the wine industry was equal to 9.00×10<sup>8</sup> RMB·year<sup>-1</sup> in the Eastern Foot of Helan Mountain [30]. The total annual income of eco-poverty alleviation was estimated to 1.67×10<sup>8</sup> RMB·year<sup>-1</sup> in Hongsibu.</p> <hr/> |
